# Supplementary material
Source: Elsevier journal article supplement (https://comptes-rendus.academie-sciences.fr/chimie/article/10.1016/j.crci.2008.06.020/file/attach/mmc1.pdf)
Supplement: mmc1 [file mmc1.pdf]

## Supporting Information 1 (Oliveira et al.)

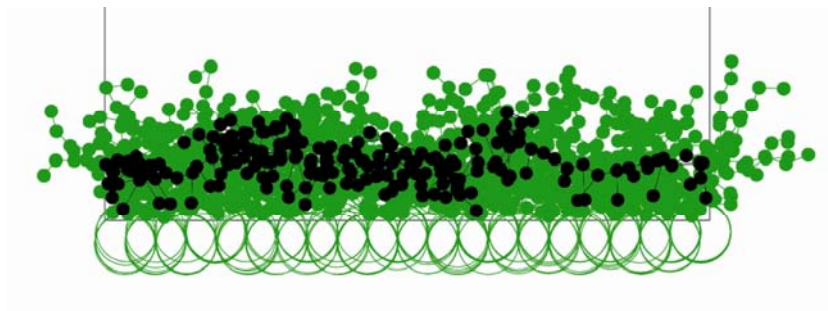

Instantaneous conformation without  $\text{CaCl}_2$  showing core (green) and 5 protamine molecules (black). Note that the protamines are closer to the hydrocarbon chain region than in Fig. 4C.
